# Supplementary material
Source: publisher figshare collection journal article supplement (https://acs.figshare.com/ndownloader/files/23087105)
Supplement: Supplementary file 1 [file 23087105]

## Supporting Information: Independent Generation and Reactivity of 2'-Deoxyguanosin-N1-yl Radical

Liwei Zheng and Marc M. Greenberg\*

Department of Chemistry, Johns Hopkins University, 3400 N. Charles St., Baltimore, MD 21218

[mgreenberg@jhu.edu](mailto:mgreenberg@jhu.edu)

### Contents:

1. **Figure S1.**  $^1\text{H}$  NMR and  $^{13}\text{C}$  NMR spectra of **5**. (S2)
2. **Figure S2.**  $^1\text{H}$  NMR and  $^{13}\text{C}$  NMR spectra of **6**. (S3)
3. **Figure S3.**  $^1\text{H}$  NMR and  $^{13}\text{C}$  NMR spectra of debenzylated **3**. (S4)
4. **Table S1.** Retention times and response factors for HPLC analysis. (S5)
5. **Figure S4.** UV-Vis spectrum of **3**. (S5)
6. **Figure S5.** HPLC chromatograms (260 nm detection) of photolysates (5 min) of **3** (0.1 mM) under anaerobic conditions in phosphate buffer (10 mM, pH = 7.2) (a) in the presence of BME (10 mM); (b) in the absence of BME. (c) Solution containing dT (0.1 mM) and NP (0.1 mM). (S6)
7. **Figure S6.** HPLC chromatograms (260 nm detection) of photolysates (3 h) of **3** (0.1 mM) under aerobic conditions in phosphate buffer (10 mM, pH = 7.2) (a) in the presence of BME (10 mM); (b) in the absence of BME, and photolysates (5 min) of **3** (0.1 mM) under anaerobic conditions in phosphate buffer (10 mM, pH = 7.2) (c) in the presence of BME (10 mM); (d) in the absence of BME. (S7)

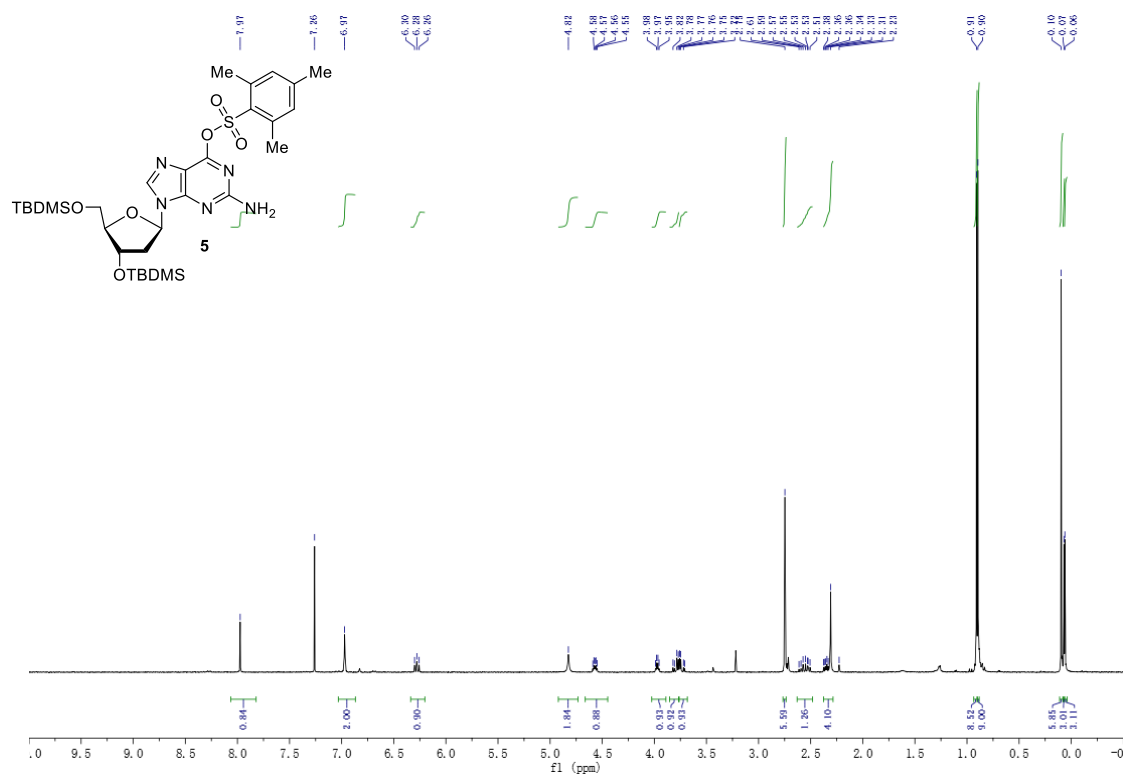

**Figure S1.**  $^1\text{H}$  NMR (400 MHz) spectrum of **5** ( $\text{CDCl}_3$ ). See Reference 28.

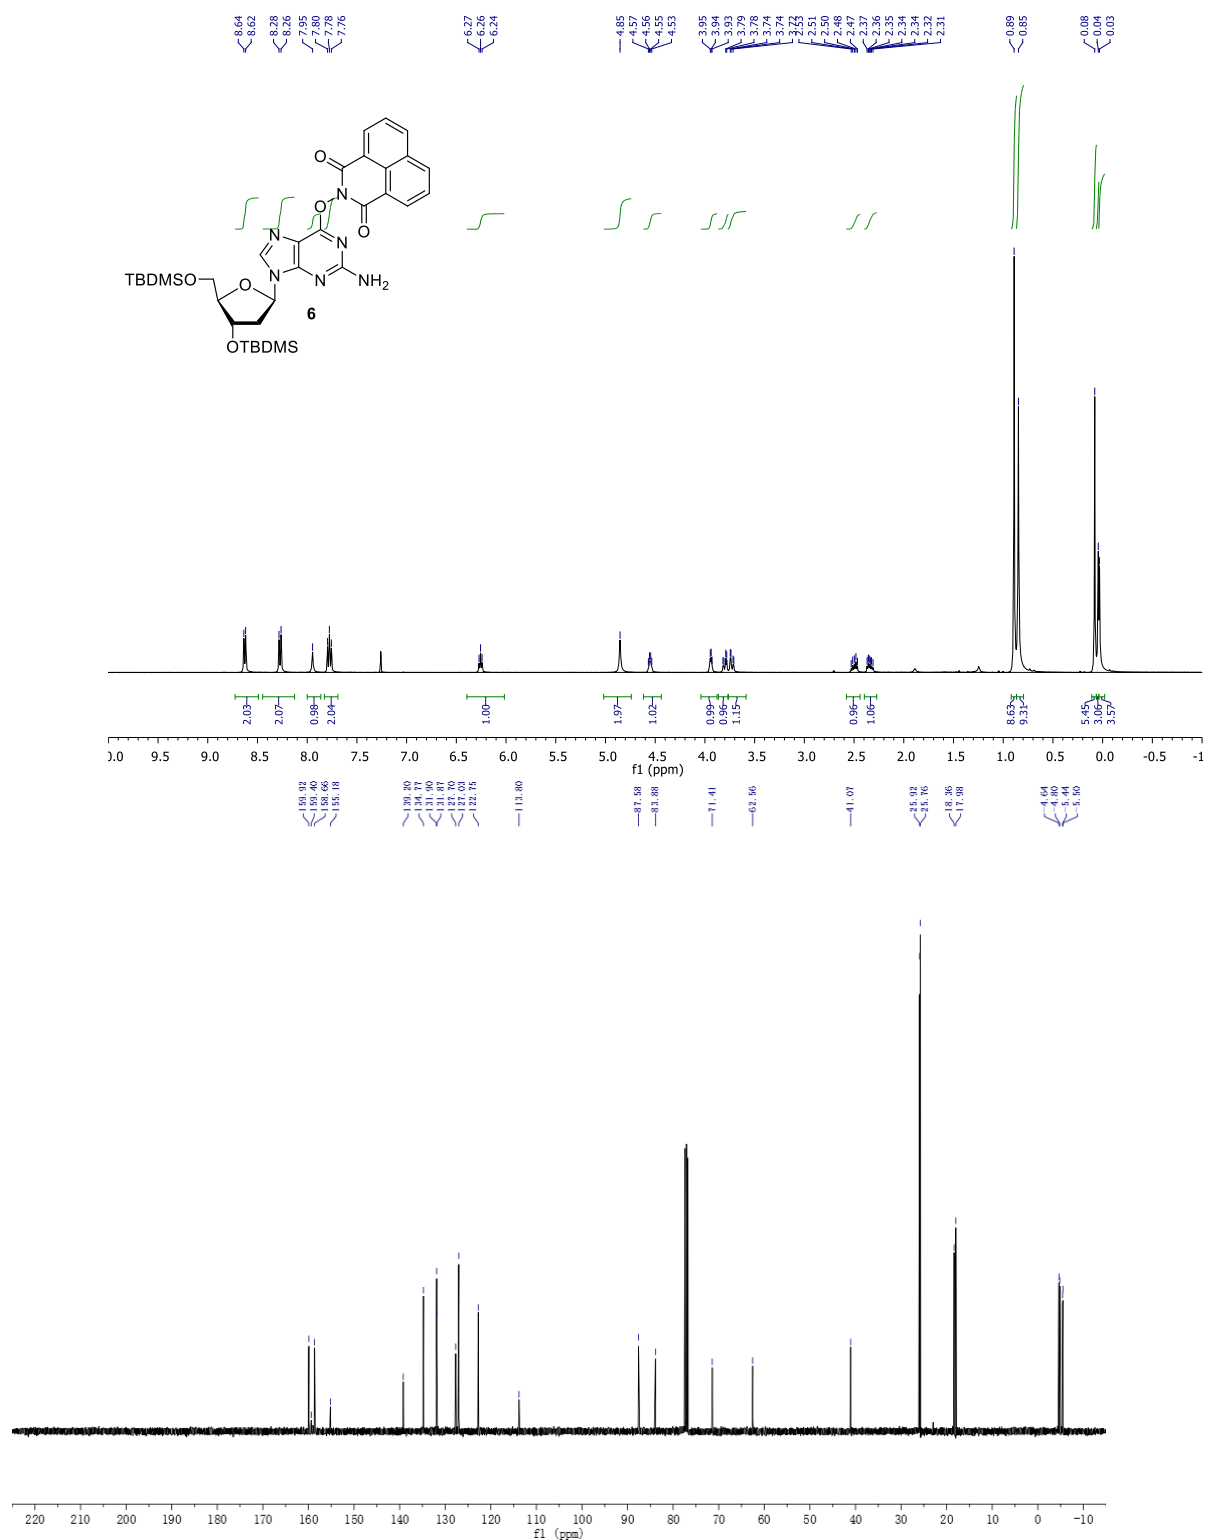

**Figure S2.**  $^1\text{H}$  NMR (400 MHz) and  $^{13}\text{C}$  NMR (101 MHz) spectra of **6** ( $\text{CDCl}_3$ ).

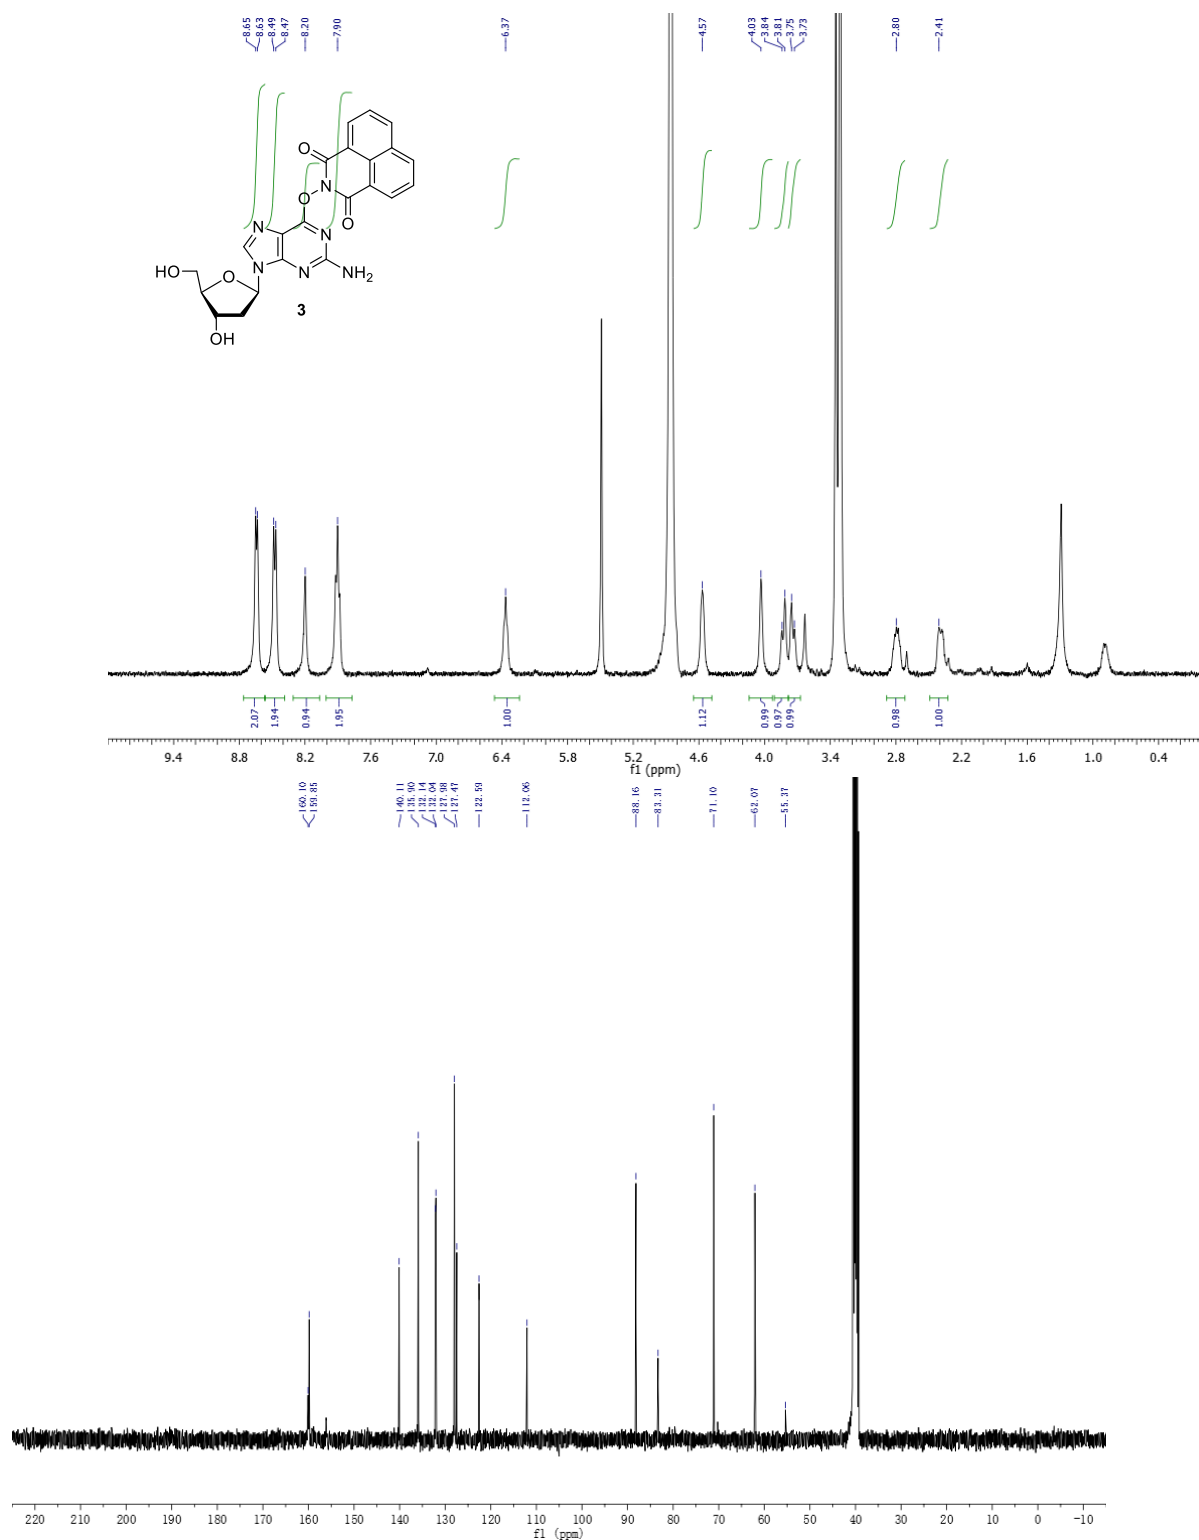

**Figure S3.** <sup>1</sup>H NMR (400 MHz) and <sup>13</sup>C NMR (101 MHz) spectra of **3** (d<sub>6</sub>-DMSO).

**Table S1. Retention times and response factors for HPLC analysis.**

| Compound  | Retention time (min) | Response factor<br>(260 nm) |
|-----------|----------------------|-----------------------------|
| T         | 8.2                  | -                           |
| dG        | 7.4                  | 0.84                        |
| <b>3</b>  | 15.5                 | 2.2                         |
| <b>NP</b> | 16                   | 9.1                         |

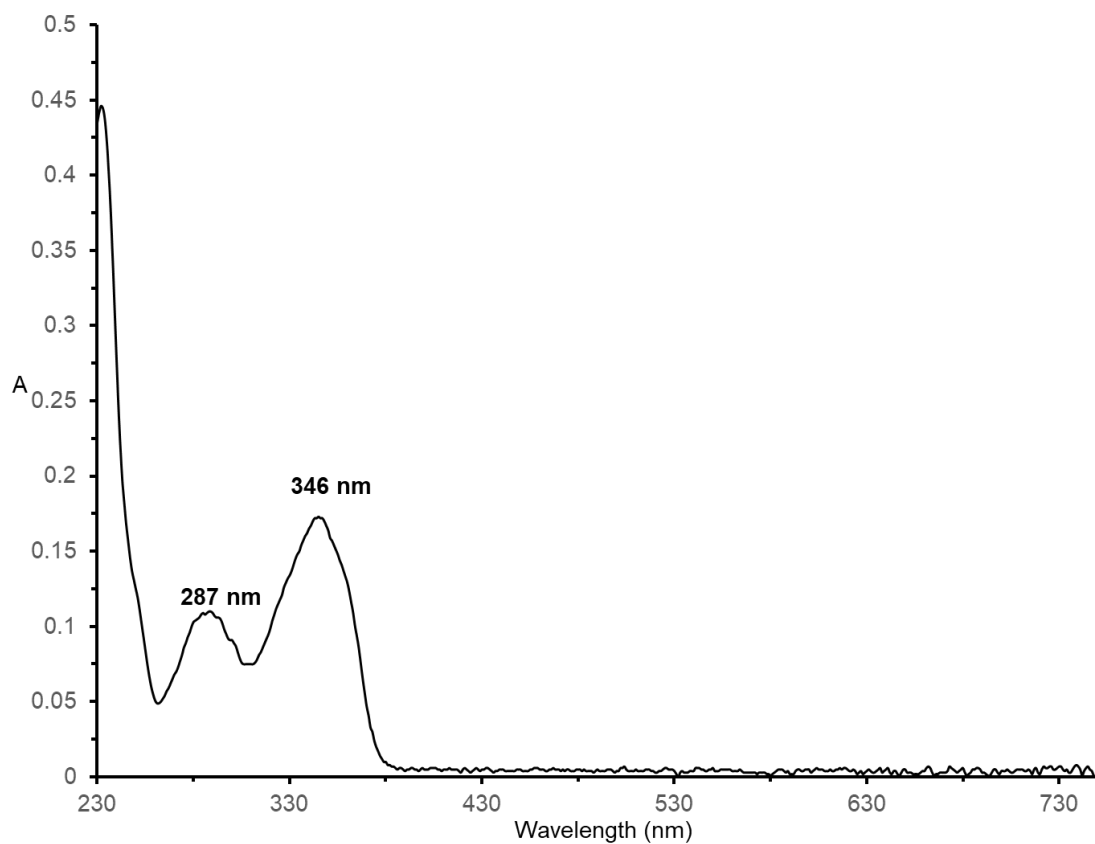

**Figure S4.** UV-Vis spectrum of **3** (0.1 mM, 1 cm pathlength).

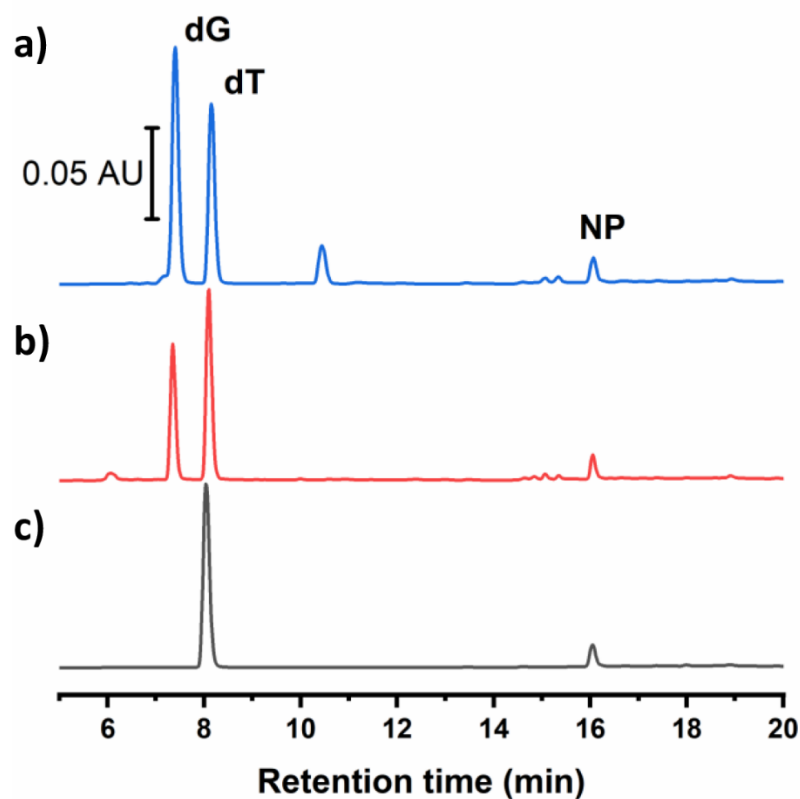

**Figure S5.** HPLC chromatograms (260 nm detection) of photolysates (5 min) of **3** (0.1 mM) under anaerobic conditions in phosphate buffer (10 mM, pH = 7.2) (a) in the presence of BME (10 mM); (b) in the absence of BME. (c) Solution containing dT (0.1 mM) and NP (0.1 mM).

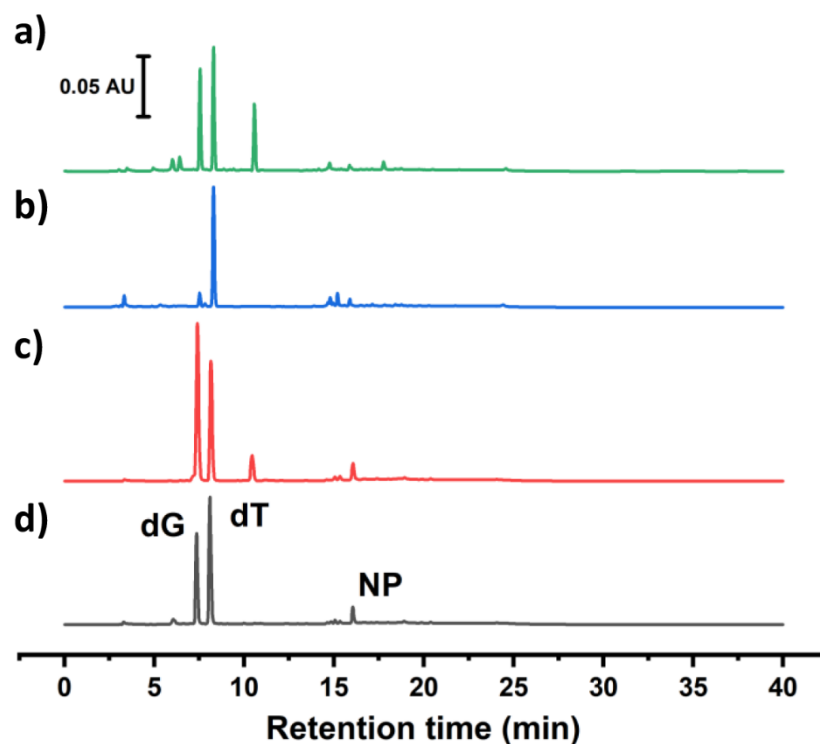

**Figure S6.** HPLC chromatograms (260 nm detection) of photolysates (3 h) of **3** (0.1 mM) under aerobic conditions in phosphate buffer (10 mM, pH = 7.2) (a) in the presence of BME (10 mM); (b) in the absence of BME, and photolysates (5 min) of **3** (0.1 mM) under anaerobic conditions in phosphate buffer (10 mM, pH = 7.2) (c) in the presence of BME (10 mM); (d) in the absence of BME.
